# Supplementary material for: Predicting post-surgical functional status in high-grade glioma with resting state fMRI and machine learning
Source: PubMed Central journal article supplement (PMC11269343; doi:10.1007/s11060-024-04715-1), 2024-05-24
Supplement: 11060_2024_4715_MOESM2_ESM.pdf [file 11060_2024_4715_MOESM2_ESM.pdf]

|                                         | All Data  | KPS<70   | KPS≥70    | p-value |
|-----------------------------------------|-----------|----------|-----------|---------|
| N                                       | 102       | 21       | 81        |         |
| Survival(m)<br>(Median±MAD)             | 16.1±13.5 | 12.1±8.8 | 18.3±14.2 | .02     |
| Age(y) at Diagnosis<br>(Mean±STD)       | 56.1±14.6 | 65±12.2  | 53.8±14.4 | .001    |
| KPS-Surgery dates (Days,<br>Median±MAD) | 25±145    | 25±185   | 25±134    | 0.69    |
| Sex (Male)                              | 48.04%    | 42.9%    | 49.4%     | 0.59    |
| Tumor hemisphere (%Right)               | 59.8%     | 61.9%    | 59.3%     | 0.98    |
| STR                                     | 31.2%     | 28.6%    | 32.1%     | 0.76    |
| NTR                                     | 17.7.3%   | 9.5%     | 19.8%     | 0.27    |
| GTR                                     | 42.2%     | 52.4%    | 39.5%     | 0.28    |
| LITT                                    | 8.8%      | 4.8%     | 9.9%      | 0.46    |
| MGMT                                    | 43.1%     | 57.1%    | 39.5%     | 0.15    |
| TERT                                    | 54.9%     | 66.7%    | 51.9%     | 0.22    |
| PTEN                                    | 46.1%     | 57.1%    | 43.2%     | 0.25    |
| EGFR                                    | 36.3%     | 33.3%    | 37.0%     | 0.75    |
| IDH1                                    | 16.67%    | 4.8%     | 19.8%     | 0.1     |
| Hx AUD                                  | 3.9%      | 0%       | 4.9%      | 0.3     |
| Hx Tobacco                              | 27.5%     | 19.1%    | 29.6%     | 0.33    |
| Hx HTN                                  | 42.2%     | 71.4%    | 34.6%     | 0.002   |
| Hx HLD                                  | 26.5%     | 47.6%    | 20.9%     | 0.01    |
| Hx CKD                                  | 2%        | 4.8%     | 1.2%      | 0.3     |
| Hx Cardiac                              | 13.7%     | 19.1%    | 12.4%     | 0.43    |
| Hx DVT/PE                               | 2.9%      | 0%       | 3.7%      | 0.37    |
| Hx Psychological                        | 34.3%     | 47.6%    | 30.9%     | 0.15    |
| Hx Visual Deficit                       | 2%        | 4.7%     | 1.2%      | 0.3     |
| Hx Stroke                               | 2.9%      | 0%       | 3.7%      | 0.37    |
| Hx Headaches                            | 2.9%      | 4.7%     | 2.5%      | 0.58    |
| Hx Weakness                             | 2.9%      | 4.8%     | 2.5%      | 0.58    |
| Hx Seizure                              | 4.9%      | 0%       | 6.1%      | 0.24    |
| Pw Aphasia                              | 24.5%     | 14.3%    | 27.2%     | 0.22    |
| Pw Weakness                             | 34.3%     | 47.6%    | 30.9%     | 0.15    |
| Pw Visual_Changes                       | 16.7%     | 19.1%    | 16.1%     | 0.73    |
| Pw Confusion                            | 29.4%     | 33.3%    | 28.4%     | 0.66    |
| Pw Headaches                            | 42.2%     | 23.8%    | 46.9%     | 0.06    |
| Pw Memory_Imp                           | 12.8%     | 9.5%     | 13.6%     | 0.62    |
| Pw Seizure                              | 24.5%     | 57.1%    | 16.1%     | <0.001  |
| Pw Obesity                              | 24.5%     | 28.6%    | 23.5%     | 0.63    |
| Pw Diabetes                             | 13.7%     | 23.8%    | 11.1%     | 0.13    |

**Supplemental Table 1.** Patient Demographics. Continuous data used the Kruskal-Wallis test; ratios used the chi-squared test. Hx = History of, Pw = presented with, AUD = alcohol use disorder, HTN = hypertension, HLD = hyperlipidemia, CKD = chronic kidney disease.
